# Supplementary material for: Worldwide variations in COVID-19 vaccination policies and practices in liver transplant settings: results of a multi-society global survey
Source: PubMed Central journal article supplement (PMC11235330; doi:10.3389/frtra.2023.1332616), 2024-01-19
Supplement: Datasheet1.pdf [file Datasheet1.pdf]

**Supplementary table 1: COVID19 Vaccine policies for Liver Transplant Patients (Questions 1-5)**

|                                                 |                                                      | AR                | EMR               | ER                | SEAR              | WPR               |
|-------------------------------------------------|------------------------------------------------------|-------------------|-------------------|-------------------|-------------------|-------------------|
|                                                 |                                                      | contr. vs mean; p | contr. vs mean; p | contr. vs mean; p | contr. vs mean; p | contr. vs mean; p |
| Prioritized access                              | Transplant patients                                  | 0.483; p<0.001    | -1.331; p<0.001   | 0.418; p<0.001    | 0.969; p<0.001    | 1.686; p<0.001    |
|                                                 | Health care workers                                  | 0.386; p<0.001    | N/A               | 0.633; <0.001     | -0.345; p<0.001   | -1.066; p<0.001   |
|                                                 | Co-habitants/life                                    | -0.660; p<0.001   | -1.861; p<0.001   | 0.493; p<0.001    | 0.440; p<0.001    | 0.554; p<0.001    |
|                                                 | Other categories                                     | N/A               | N/A               | N/A               | N/A               | N/A               |
| Recommend vaccine                               | Only mRNA vaccines                                   | -0.032; p<0.001   | -2.361; p<0.001   | 0.634; p<0.001    | N/A               | -0.644; p<0.001   |
|                                                 | Booster (third) dose                                 | 1.679; p<0.001    | N/A               | -0.206; p<0.001   | -2.847; p<0.001   | -0.930; p<0.001   |
| Barriers                                        | Presence of any of the follows                       | -0.774; p<0.001   | 3.814; p<0.001    | 0.377; p<0.001    | -0.436; p<0.001   | 0.705; p<0.001    |
|                                                 | Patient's Fear                                       | -0.511; p<0.001   | 0.609; p<0.001    | 0.312; p<0.001    | -0.490; p<0.001   | 0.036; p<0.001    |
|                                                 | Regional or National Public Health Policy            | 0.460; p<0.001    | N/A               | -1.709; p<0.001   | N/A               | 1.158; p<0.001    |
|                                                 | Age                                                  | -0.839; p<0.001   | 1.389; p<0.001    | 0.073; p<0.001    | 0.290; p<0.001    | N/A               |
|                                                 | Logistics/Organization                               | 0.350; p<0.001    | 2.109; p<0.001    | -1.249; p<0.001   | 1.011; p<0.001    | N/A               |
|                                                 | Funding                                              | 1.700; p<0.001    | N/A               | -1.209; p<0.001   | N/A               | N/A               |
|                                                 | Others                                               | 0.194; p<0.001    | N/A               | -0.478; p<0.001   | N/A               | 0.285; p<0.001    |
| Facility Ordering                               | Health-care authorities                              | -0.707; p<0.001   | -0.856 p<0.001    | -1.009 p<0.001    | -1.305 p<0.001    | 3.053 p<0.001     |
|                                                 | Primary care physician                               | -0.042 p<0.001    | N/A               | 1.748 p<0.001     | 1.403 p<0.001     | -2.532 p<0.001    |
|                                                 | Transplant provider                                  | 1.075 p<0.001     | 1.505 p<0.001     | 0.286 p<0.001     | 0.992 p<0.001     | -2.816 p<0.001    |
| Other vaccines (flu, etc) routinely recommended | Routinely recommended                                | 1.775 p<0.001     | 0.178 p<0.001     | -0.003 p<0.001    | -1.941 p<0.001    | -1.316 p<0.001    |
|                                                 | Provided by Primary Care Clinic vs Transplant Center | 0.277 p=0.007     | -17.112 p<0.001   | 0.848 p<0.001     | -1.564 p<0.001    | 1.812 p<0.001     |

*AR: American Regions; EMR: Ester Mediterranean Regions; ER: European Regions; SEAR: South East Asia Regions; WPR: Wester Pacific Regions*

*All results have been reported comparing each region with weighted grand mean equal to 0; p values have been expressed after Bonferroni correction, however all the results should be interpreted as trends.*

**Supplementary table 2: Assessment and Management in Liver Transplant Patients underwent COVID19 vaccination (questions 6-11)**

|                                                                |                                   | AR                | EMR               | ER                | SEAR              | WPR               |
|----------------------------------------------------------------|-----------------------------------|-------------------|-------------------|-------------------|-------------------|-------------------|
|                                                                |                                   | contr. vs mean; p | contr. vs mean; p | contr. vs mean; p | contr. vs mean; p | contr. vs mean; p |
| Liver function test (LFT) or immunosuppression (IS) monitoring |                                   | -0.174; p<0.001   | 0.977; p<0.001    | 0.384; p<0.001    | -0.299; p<0.001   | -0.067; p<0.001   |
| Time of LFT or IS monitoring                                   | 2 weeks vs 1 months               | 0.341; p=0.011    | 18.476; p<0.001   | -1.290; p<0.001   | -0.742; p=0.001   | -2.757; p<0.001   |
| Via report of vaccine monitorization                           | Telemedicine vs Outpatient Clinic | 1.869; p<0.001    | -17.132; p<0.001  | 0.570; p=0.002    | 1.907; p<0.001    | -1.916; p<0.001   |
| Dose of IS modification pre-vaccine                            |                                   | -0.397; p<0.001   | N/A               | 0.720; p<0.001    | 1.224; p<0.001    | -1.928; p<0.001   |
| Type or dose of IS modification pre-vaccine                    | CNI reduction                     | 0.732; p<0.001    | N/A               | -0.311; p<0.001   | N/A; p<0.001      | N/A               |
|                                                                | MF reduction                      | -0.550; p<0.001   | N/A               | -0.773; p<0.001   | 1.229; p<0.001    | N/A               |
|                                                                | MF interruption                   | N/A               | N/A               | -0.490; p<0.001   | 0.599; p<0.001    | N/A               |
|                                                                | Steroids reduction                | 1.322; p<0.001    | N/A               | -0.562; p<0.001   | N/A               | N/A               |
|                                                                | Steroids interruption             | -0.259; p<0.001   | N/A               | 0.134; p<0.001    | N/A               | N/A               |

*AR: American Regions; EMR: Ester Mediterranean Regions; ER: European Regions; SEAR: South East Asia Regions; WPR: Wester Pacific Regions*

*LFT: Liver Function Test; CNI: Calcineurin Inhibitor; MF: Mycophenolate*

*All results have been reported comparing each region with weighted grand mean equal to 0; p values have been expressed after Bonferroni correction, however all the results should be interpreted as trends.*

**Supplementary table 3: Side Effects Post Vaccination per Center (Questions 8-11)**

|                                          | AR                | EMR               | ER                | SEAR              | WPR               |
|------------------------------------------|-------------------|-------------------|-------------------|-------------------|-------------------|
|                                          | contr. vs mean; p | contr. vs mean; p | contr. vs mean; p | contr. vs mean; p | contr. vs mean; p |
| Total Side Effect (except LFT elevation) | 0.433; p<0.001    | 0.738; p<0.001    | 0.229; p<0.001    | -0.234; p<0.001   | -1.028; p<0.001   |
| LFT elevation post-vaccination           | 0.606; p<0.001    | -2.042; p<0.001   | -0.264; p<0.001   | -0.588; p<0.001   | -0.098; p<0.001   |
| Thrombosis or thromboembolic event       | -0.449; p<0.001   | -1.059; p<0.001   | 0.022; p<0.001    | 1.060; p<0.001    | 0.211; p<0.001    |
| Acute graft rejection                    | 1.327; p<0.001    | N/A               | -0.258; p<0.001   | -0.432; p<0.001   | -1.885; p<0.001   |
| Allergy Related                          | -0.858; p<0.001   | N/A               | 1.132; p<0.001    | 0.398; p<0.001    | N/A               |
| Significant Liver Related                | 0.579; p<0.001    | N/A               | -0.930; p<0.001   | N/A               | N/A               |
| Others*                                  | 0.367; p<0.001    | 1.776; p<0.001    | -0.804; p<0.001   | -0.145; p<0.001   | 0.088; p<0.001    |
| Estimate Rate of Significant ADE**       | 1.292; p<0.001    | N/A               | 0.344; p<0.001    | N/A               | -2.740; p<0.001   |

AR: American Regions; EMR: Ester Mediterranean Regions; ER: European Regions; SEAR: South East Asia Regions; WPR: Wester Pacific Regions LFT: Liver Function Test;

\* Over 38 centers that reported sides effects, only 36.8% (n=14) specified the number of patients having sides effects. The total number of patients affected by side effects was 23.

\*\* Myocardial infarction (n=2); post-transplant lymphoproliferative disease (n=2); Cholangitis (n=1); Guillain Barré (n=1); Leucopenia (n=1); Thrombocytopenia (n=1) Lymphadenitis (n=1); Retinal detachment (n=1); menorrhagia/dysmenorrhea (n=1); unknow (n=1).

All results have been reported comparing each region with weighted grand mean equal to 0; p values have been expressed after Bonferroni correction, however all the results should be interpreted as trends.

**Supplementary table 4: Efficacy Assessment (questions 12-13)**

|                            |                  | AR                | EMR               | ER                | SEAR              | WPR               |
|----------------------------|------------------|-------------------|-------------------|-------------------|-------------------|-------------------|
|                            |                  | contr. vs mean; p | contr. vs mean; p | contr. vs mean; p | contr. vs mean; p | contr. vs mean; p |
| Centers Testing Antibodies |                  | -0.863; p<0.001   | -1.661; p<0.001   | 1.579; p<0.001    | -0.682; p<0.001   | 0.463; p<0.001    |
| Timing of antibody testing | 1 month          | -0.074; p<0.001   | N/A               | 0.500; p<0.001    | 0.506; p<0.001    | -1.209; p<0.001   |
|                            | 3 months         | 1.148; p<0.001    | N/A               | 0.026; p<0.001    | N/A               | -0.760; p<0.001   |
| Infection post vaccine     |                  | 0.484; p<0.001    | 2.793; p<0.001    | 0.520; p<0.001    | -0.400; p<0.001   | -2.208; p<0.001   |
|                            | Severe infection | 0.826; p<0.001    | N/A               | -0.553; p<0.001   | 1.225; p<0.001    | N/A               |

AR: American Regions; EMR: Ester Mediterranean Regions; ER: European Regions; SEAR: South East Asia Regions; WPR: Wester Pacific Regions LFT: Liver Function Test;

All results have been reported comparing each region with weighted grand mean equal to 0; p values have been expressed after Bonferroni correction, however all the results should be interpreted as trends.

**Supplementary table 5: Center data (questions 14-15)**

|                                      |                       | <b>AR</b>                | <b>EMR</b>               | <b>ER</b>                | <b>SEAR</b>              | <b>WPR</b>               |
|--------------------------------------|-----------------------|--------------------------|--------------------------|--------------------------|--------------------------|--------------------------|
|                                      |                       | <b>contr. vs mean; p</b> | <b>contr. vs mean; p</b> | <b>contr. vs mean; p</b> | <b>contr. vs mean; p</b> | <b>contr. vs mean; p</b> |
| LT patients alive (n)*               |                       | -57.684                  | -437.959                 | -3.146                   | -116.313                 | 252.456                  |
| Timing of vaccination administration | <3 months             | 9.031                    | -19.402                  | -8.253                   | 9.538                    | -13.089                  |
|                                      | 3-6 months            | 21.809                   | -35.414                  | -0.201                   | -18.710                  | -19.835                  |
|                                      | 6-12 months           | 10.321                   | -38.748                  | -4.219                   | -5.391                   | -4.493                   |
|                                      | >12 months            | 3.188                    | -18.137                  | -0.215                   | -9.323                   | 1.933                    |
| Globally Vaccinated (%)              |                       | 3.700                    | -19.229                  | 1.083                    | -11.851                  | 3.239                    |
| Patients Vaccinated (n)*             |                       | -88.158                  | -432.388                 | -83.250                  | 64.957                   | 297.549                  |
| Type of vaccine administered         | mRNA                  | 7.874                    | -40.555                  | 27.166                   | -43.288                  | -9.155                   |
|                                      | Viral Vector          | 4.369                    | 41.916                   | -27.401                  | 37.249                   | -8.201                   |
|                                      | Viral vector and mRNA | 2.472                    | -4.695                   | -2.392                   | -4.081                   | 2.282                    |
|                                      | Others                | -14.506                  | 3.213                    | 2.505                    | 9.999                    | 14.954                   |

*AR: American Regions; EMR: Ester Mediterranean Regions; ER: European Regions; SEAR: South East Asia Regions; WPR: Wester Pacific Regions LFT: Liver Function Test; All results have been reported comparing each region with weighted grand mean equal to 0; p values have been expressed after Bonferroni correction, however all the results should be interpreted as trends. \* This estimation is based on the number of alive patients (available in 58.9%, n=99) and the rate of fully vaccinated patients per center.*

**Supplementary table 6: missing variables addressed by multiple imputations**

| Variables                                                    | Complete | Incomplete | Imputed | Total |
|--------------------------------------------------------------|----------|------------|---------|-------|
| Number of liver transplant patients                          | 99       | 69         | 45      | 168   |
| Number of vaccinated patients                                | 88       | 80         | 52      | 168   |
| Number of patients presenting side effects after vaccination | 122      | 46         | 22      | 168   |
