# Supplementary material for: Worldwide variations in COVID-19 vaccination policies and practices in liver transplant settings: results of a multi-society global survey
Source: PubMed Central journal article supplement (PMC11235330; doi:10.3389/frtra.2023.1332616), 2024-01-19
Supplement: Datasheet2.pdf [file Datasheet2.pdf]

| Country             | Center                                                               | Collaborators                                           |
|---------------------|----------------------------------------------------------------------|---------------------------------------------------------|
| Argentina           | Hospital Italiano de Buenos Aires                                    | E. Mauro, MD - L. Barcan, MD                            |
| Argentina           | Consultorio                                                          |                                                         |
| Brazil              | Unicamp                                                              | R. Stucchi, MD - I. Boin, MD                            |
| Brazil              | Hospital do Rocio                                                    | F. Silveira, MD                                         |
| Canada              | Centre Hospitalier de l'Université de Montréal                       | I. Ruiz, MD - G. Huard, MD                              |
| Canada              | Toronto General Hospital                                             |                                                         |
| Canada              | Queen Elizabeth II Health Sciences Centre, Halifax                   | K. M. Peltekian, MD, FRCPC                              |
| Chile               | Pontificia Universidad Catolica de Chile                             | J. P. Arab, MD - L. A. Díaz, MD                         |
| Colombia            | Centro Médico Imbanaco de Cali                                       | A. Vanin, MD                                            |
| Costa Rica          | Hospital Mexico                                                      |                                                         |
| Mexico              | Hospital General de Mexico                                           | V. Visag-Castillo, MD - V. Páez Zayas, MD               |
| Mexico              | National Institute of Health Sciences and Nutrition Salvador Zubirán | N. C. Flores García, MD                                 |
| Mexico              | Hospital CMNO IMSS                                                   |                                                         |
| Panama              | Caja de Seguro Social - Complejo Hospitalario Metropolitano          | J. Lombardo MD - M. Spence MD                           |
| Peru                | Transplant Department. Guillermo Almenara National Hospital          | P. M. Padilla- Machaca MD, PhD, FAASLD - B. Cárdenas MD |
| Trinidad and Tobago | EWMSC/NOTU                                                           |                                                         |
| USA                 | TNVU - Vanderbilt University Medical Center - Nashville              |                                                         |
| USA                 | MNUM - University of Minnesota Medical Center, Fairview              |                                                         |
| USA                 | Mont Sinai New York                                                  |                                                         |
| USA                 | Intermountain Healthcare - Intermountain Medical Center              | D. Alonso, MD - R. Gilroy, MD                           |
| USA                 | Ochsner Medical Center                                               |                                                         |
| USA                 | Thomas Jefferson University Hospital                                 |                                                         |
| USA                 | Northwestern University                                              |                                                         |
| USA                 | Keck Medicine of USC                                                 | J. A. Kahn, MD                                          |
| USA                 | Intermountain Medical Center                                         | A. G. Contreras, MD                                     |
| USA                 | Emory                                                                |                                                         |
| USA                 | University of Nebraska Medical Center - Omaha, NE                    |                                                         |
| USA                 | University of Rochester                                              |                                                         |
| USA                 | UPMC Hospital of Pittsburgh                                          |                                                         |
| USA                 | UTMC - University of Utah Medical Center, Salt Lake City             |                                                         |
| USA                 | Aurora St Luke's Medical Center, Milwaukee                           |                                                         |
| USA                 | Barnes Hospital                                                      |                                                         |
| USA                 | University of Chicago Medicine                                       |                                                         |
| USA                 | Cleveland Clinic                                                     |                                                         |
| USA                 | University of Colorado                                               | M. Kriss MD - L. Schoch, MSN, RN, CCTC                  |
| USA                 | OHOU - Ohio State University Medical Center                          |                                                         |

|                |                                                       |                                                |
|----------------|-------------------------------------------------------|------------------------------------------------|
| USA            | University of Rochester/ Strong Memorial Hospital     |                                                |
| USA            | TNMH - Methodist University Hospital - Memphis        |                                                |
| USA            | University of Minnesota                               | V. A. Kirchner, MD                             |
| USA            | Mayo Minnesota                                        | K. D. Watt, MD                                 |
| USA            | Mayo Florida                                          |                                                |
| USA            | Medstar-Georgetown University Hospital                |                                                |
| USA            | Montefiore Medical Center                             |                                                |
| USA            | Louis and Houston Methodist Hospital, HMM             |                                                |
| USA            | University of Arkansas for Medical Sciences           | E. Giorgakis, MD - L. Burdine MD               |
| USA            | University of Maryland                                |                                                |
| USA            | University of California, Los Angeles (UCLA)          |                                                |
| Egypt          | National Liver Institute                              |                                                |
| Egypt          | Ain Shams University Center for Organ Transplantation | M. El Meteini, MD - I. Montasser, MD Professor |
| Oman           | Royal Hospital                                        | S. Al Zaabi, MD                                |
| Austria        | Innsbruck                                             |                                                |
| Austria        | Vienna                                                | G. Berlakovich MD, Professor - G. Gyoeri, MD   |
| Austria        | Akh                                                   |                                                |
| Azerbaijan     | Azerbaijan Medical Universty                          | N. Bayramov, Prof. MD                          |
| Belgium        | Not Avilable                                          |                                                |
| Croatia        | University Hospital Center Zagreb                     | A. Mrzljak, MD - M. Premuzic, MD               |
| Croatia        | UHC Zagreb Liver Transplant Unit                      | M. Kovačić, MD - J. Vuković, MD                |
| Czech Republic | Prague Transplant Program                             | J. Havlin, MD - T. Kotowski, MD                |
| Czech Republic | University Hospital Hradec Kralove                    |                                                |
| Finland        | Helsinki                                              |                                                |
| France         | Paul Brousse                                          | I. Kounis, MD - B. Roche, MD                   |
| France         | Montpellier                                           | L. Meunier, MD                                 |
| Georgia        | Batumi Referral Hospital-liver transplant center      | S. Beridze, MD, PhD - K. Kashibadze, MD, PhD   |
| Germany        | Leipzig                                               | T. Berg, MD, Professor                         |
| Germany        | UKSH, Campus Kiel                                     |                                                |
| Germany        | Tübingen                                              |                                                |
| Germany        | Hannover                                              |                                                |
| Greece         | General Hospital of Athens "Laiko"                    | N. Machairas, MD - G. C. Sotiropoulos, MD      |
| Ireland        | Dublin                                                |                                                |
| Italy          | Federico II University Hospital                       | M. Guarino, MD - V. Cossiga, MD                |
| Italy          | Papa Giovanni XXIII, Bergamo                          | S. Fagioli, MD - L. Pasulo, MD                 |
| Italy          | Palermo ISMETT                                        |                                                |
| Italy          | Azienda Policlinico, University of Catania            |                                                |

|             |                                                                                       |                                                                          |
|-------------|---------------------------------------------------------------------------------------|--------------------------------------------------------------------------|
| Italy       | University Hospital of Padova                                                         |                                                                          |
| Italy       | Tor Vergata University Hospital                                                       | R. Angelico, MD - T. M. Manzia, MD                                       |
| Italy       | Niguarda Hospital                                                                     | L. S. Belli, MD - G. Perricone, MD - L. De Carlis, MD - R. De Carlis, MD |
| Italy       | Molinette Hospital                                                                    |                                                                          |
| Italy       | Naples University Hospital                                                            |                                                                          |
| Italy       | University Hospital Policlinico of Bari                                               | A. Di Leo, MD - L. G. Lupo, MD                                           |
| Italy       | La Sapienza Hospital                                                                  | Q. Lai, MD - M. Rossi, MD                                                |
| Italy       | Policlinico Maggiore of Milan                                                         | M. F. Donato, MD - C. Dibenedetto, MD                                    |
| Italy       | Policlinico Gemelli Hospital                                                          | M. M. Pascale, MD - G. Bianco, MD - S. Agnes, MD                         |
| Italy       | IRCCS Azienda Ospedaliero-Universitaria Bologna                                       | M. Cescon, MD - M. Ravaioli, MD                                          |
| Netherlands | UMCG (Groningen)                                                                      | V. E. De Meijer, MD                                                      |
| Netherlands | Rotterdam - Erasmus MC                                                                |                                                                          |
| Norway      | Oslo University Hospital                                                              |                                                                          |
| Portugal    | Centro Hospitalar Universitário do Porto                                              |                                                                          |
| Portugal    | Unidade de transplantação hepática de adultos, Coimbra                                | S. M. N. Calretas, MD                                                    |
| Romania     | Clinical Institute for Transplantation                                                |                                                                          |
| Russia      | Almazov National Médical Research Centre                                              | M. Simonenko, MD                                                         |
| Russia      | Moscow Clinical Scientific Center                                                     | R. Alikhanov, MD - E. Sbikina, MD                                        |
| Russia      | Moscow Regional Scientific Research Clinical Institute n.a. M.F. Vladimirsky          | K. Kokina, MD - Y. Moysyuk, MD                                           |
| Russia      | Burnasyan Federal Medical Biophysical Center of the Federal Medical Biological Agency | S. E. Voskanyan, MD - A. I. Sushkov, MD                                  |
| Spain       | Santiago, Hsopital clinico Universitario de Santiago                                  |                                                                          |
| Spain       | Murcia, Clinic and University Virgen de la Arrixaca Hospital                          |                                                                          |
| Spain       | Valladolid, Hospital Universitario Rio Hortega                                        | F. García Pajares, MD - C. Alonso Martín, MD                             |
| Spain       | Navarra, Clinica Universidad de Navarra                                               | J. I. Herrero, MD - M. Iñarrairaegui, MD                                 |
| Spain       | Cataluña, Vall Hebron                                                                 | I. Campos-Varela, MD - L. Castells, MD                                   |
| Spain       | Tenerife, Hospital Universitario Ntra. Sra. de Candelaria                             | R. Suárez Darías, MD                                                     |
| Spain       | Valencia, Hospital La Fe                                                              | C. Vinaixa, MD - M. Berenguer, MD                                        |
| Spain       | Países Bascos, Cruces University Hospital                                             | J. Bustamante Schneider, MD - P. Salvador Bengoechea, MD                 |
| Spain       | Madrid, Hospital Gregorio Marañón                                                     | A. Caballero Marcos, MD - J. A. López-Baena, MD                          |
| Spain       | Asturias, H. Universitario Central de Asturias                                        | M. L. Gonzalez-Dieguez, MD - V. Cadahia, MD                              |
| Spain       | Santander, Hospital Universitario Marqués de Valdecilla                               |                                                                          |
| Spain       | Madrid, Puerta de Hierro                                                              | V. Cuervas-Mons, MD - A. Arias, MD                                       |
| Spain       | Alicante, HGU Alicante                                                                |                                                                          |
| Spain       | Badajoz, Hospital Universitario de Badajoz                                            | G. Blanco Fernández, MD - I. Narváez Rodríguez, MD                       |
| Spain       | Madrid, Hospital Ramón y Cajal                                                        | R. Martín Mateos, MD - J. Graus Morales, MD                              |
| Spain       | Zaragoza, Hospital Clínico Universitario Lozano Blesa                                 | S. Lorente Pérez, MD - T. Serrano Aulló, MD                              |
| Spain       | Madrid, Hospital Universitario La Paz                                                 | E. Frauca, MD                                                            |

|             |                                                          |                                                        |
|-------------|----------------------------------------------------------|--------------------------------------------------------|
| Spain       | Sevilla, Hosp Univ Virgen del Rocío                      | G. Bravo Miguel Angel, MD - A. Martinez Jose María, MD |
| Spain       | Cordoba, Hospital Reina Sofía                            | M. Rodríguez-Perálvarez, MD - M. De la Mata, MD        |
| Spain       | Cataluña, Hospital Universitari Bellvitge                | L. Llado, MD - A. Cachero, MD                          |
| Spain       | Cantabria, University Hospital Marqués de Valdecilla     |                                                        |
| Spain       | A Coruña, Hospital A Coruña                              | F. Suárez, MD - M. A. Vazquez, MD                      |
| Sweden      | Karolinska                                               | G. Soderdahl, MD                                       |
| Sweden      | Gothenburg                                               | M. Oltean, MD - A. Schult, MD                          |
| Switzerland | Centre Hospitalier Universitaire Vaudois                 |                                                        |
| Switzerland | Inselspital                                              |                                                        |
| Turkey      | Inonu University                                         |                                                        |
| Turkey      | Umraniye Health Sciences University                      | G. Adali, MD - N. M. Bilgic, MD                        |
| Turkey      | Ankara City Hospital                                     | D. Turan, MD                                           |
| Turkey      | Medipol University Hospital                              | M. Dayangac, MD - S. Kilic, MD                         |
| UK          | King's                                                   |                                                        |
| UK          | Royal Free                                               |                                                        |
| UK          | Birmingham                                               |                                                        |
| India       | Secunderabad                                             |                                                        |
| India       | Amrita Institute of Medical Sciences and Research Centre | S. Sudhindran, MD - K. Nair, MD                        |
| India       | Indraprastha Apollo Hospital                             | A. Malik, MD                                           |
| India       | Metro Multi-speciality Hospital                          |                                                        |
| India       | Apollo Gujarat                                           |                                                        |
| India       | IKDRC-ITS, Ahmedabad                                     |                                                        |
| India       | Narayana Hospital                                        |                                                        |
| India       | AIG Hospitals                                            |                                                        |
| India       | Gleneagles Global Hospital                               |                                                        |
| India       | Max Superspeciality Hospital, Saket                      |                                                        |
| India       | Ruby hall clinic                                         |                                                        |
| India       | Medanta The Medicity                                     | P. Bhangui, MD- A. S. Soin, MD                         |
| India       | Apollo Tamil Nadu                                        |                                                        |
| India       | Jupiter hospital, Pune                                   | P. Hanchanal, MD                                       |
| India       | SMS Medical College and Hospital                         |                                                        |
| India       | Dr. Rela Institute & Medical Centre                      | A. Rammohan, MD - M. Rela, MD                          |
| Nepal       | Chitwan Medical Collage                                  | S. K. Yadav, MD - S. Poudyal, MD                       |
| Thailand    | Chiang Mai University                                    | S. Junrungsee, MD                                      |
| Australia   | Westmead Hospital                                        | M. Stormon, MD                                         |
| Australia   | Flinders Medical Centre                                  |                                                        |
| Australia   | Princess Alexandra Hospital                              | C. Tallis, MD                                          |

|             |                                                                                     |                                                   |
|-------------|-------------------------------------------------------------------------------------|---------------------------------------------------|
| Australia   | Austin Health                                                                       |                                                   |
| Australia   | Royal Prince Alfred Hospital                                                        | S. Strasser, A/Professor                          |
| China       | The First Affiliated Hospital of Nanjing Medical University                         |                                                   |
| China       | Beijing Friendship Hospital                                                         |                                                   |
| China       | First Affiliated Hospital, Nanjing medical University                               |                                                   |
| China       | Beijing Tsinghua Changgung Hospital                                                 | J. Liu, MD                                        |
| Japan       | Nagoya University Hospital                                                          | Y. Ogura, MD                                      |
| Japan       | Tokyo Women's Medical University                                                    | H. Egawa, MD - S. Yamashina, MD                   |
| Japan       | Center for Organ Transplantation                                                    | M. Kasahara, MD - S. Sakamoto, MD - A. Fukuda, MD |
| Japan       | Kanazawa University                                                                 |                                                   |
| Malaysia    | University Malaya Medical Centre                                                    | Y. B. Koon, MD                                    |
| New Zealand | New Zealand Liver Transplant Unit                                                   |                                                   |
| Philippines | The Medical City                                                                    |                                                   |
| South Korea | Samsung Medical Center                                                              | J. M. Kim, MD - J. W. Joh, MD                     |
| South Korea | Seoul National University College of Medicine                                       |                                                   |
| Taiwan      | National Taiwan University Hospital                                                 | Cheng-Maw Ho, MD - Rey-Heng Hu, MD                |
| Taiwan      | Kaohsiung Chang Gung Memorial                                                       |                                                   |
| Vietnam     | Organ Transplantation Center Viet Duc Univeristy Hospital                           | N. Q. Nghia, MD                                   |
| Vietnam     | 108 Military Central Hospital - Departement of Hepatobiliary and Pancreatic Surgery | T. L. Van, MD                                     |
